# Supplementary material for: Different Growth and Sporulation Responses to Temperature Gradient among Obligate Apomictic Strains of Ulva prolifera
Source: MDPI journal article supplement (doi:10.3390/plants10112256), 2021-10-22
Supplement: s1 [file s1]

# Different Growth and Sporulation Responses to Temperature Gradient among Obligate Apomictic Strains of *Ulva prolifera*

Yoichi Sato <sup>1,2,\*</sup>, Yutaro Kinoshita <sup>1,3</sup>, Miho Mogamiya <sup>1</sup>, Eri Inomata <sup>1</sup>, Masakazu Hoshino <sup>4</sup>  
and Masanori Hiraoka <sup>3,\*</sup>

<sup>1</sup> Bio-Resources Business Development Division, Riken Food Co., Ltd., Miyagi 985-0844, Japan;  
yuu\_kinoshita@rikenfood.co.jp (Y.K.); mih\_mogamiya@rikenfood.co.jp (M.M.);  
eri\_inomata@rikenfood.co.jp (E.I.)

<sup>2</sup> Nishina Center for Accelerator-Based Science, RIKEN, Saitama 351-0198, Japan

<sup>3</sup> Usa Marine Biological Institute, Kochi University, Kochi 781-1164, Japan

<sup>4</sup> Department of Algal Development and Evolution, Max Planck Institute for Developmental Biology,  
Max-Planck-Ring 5, 72076 Tübingen, Germany; mhoshino.sci@gmail.com

\* Correspondence: yoi\_sato@rikenfood.co.jp (Y.S.); mhiraoka@kochi-u.ac.jp (M.H.);  
Tel.: +81-22-395-4226 (Y.S.); +81-88-856-0426 (M.H.)

## Supplementary Materials

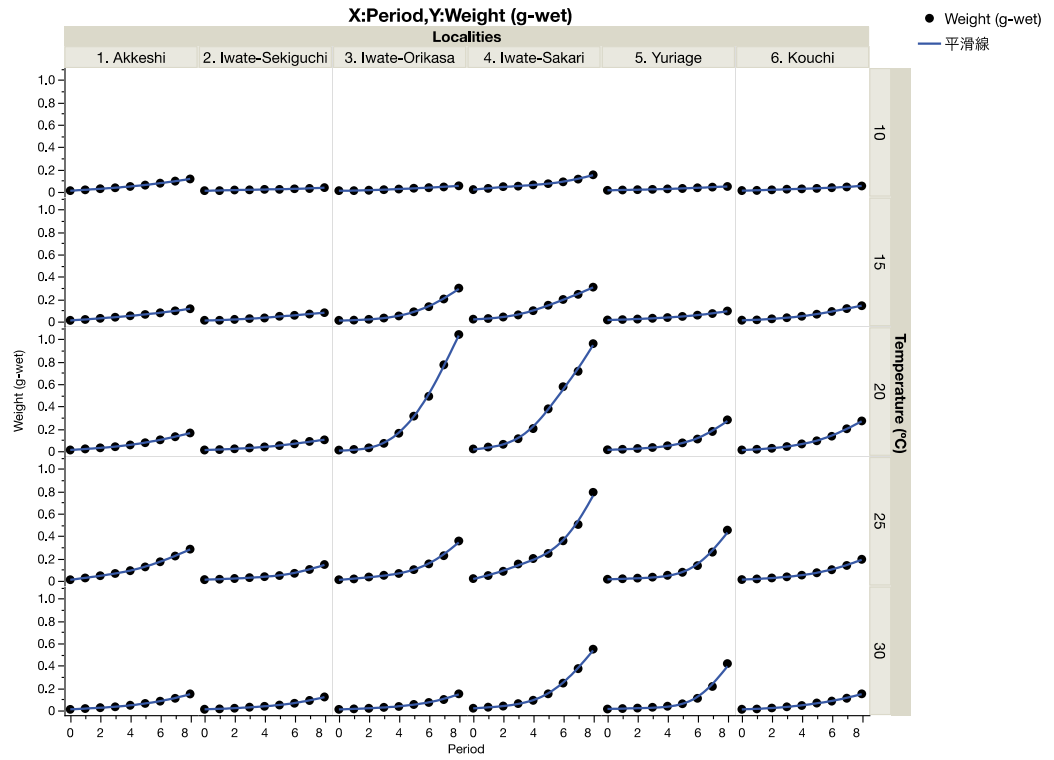

(a)

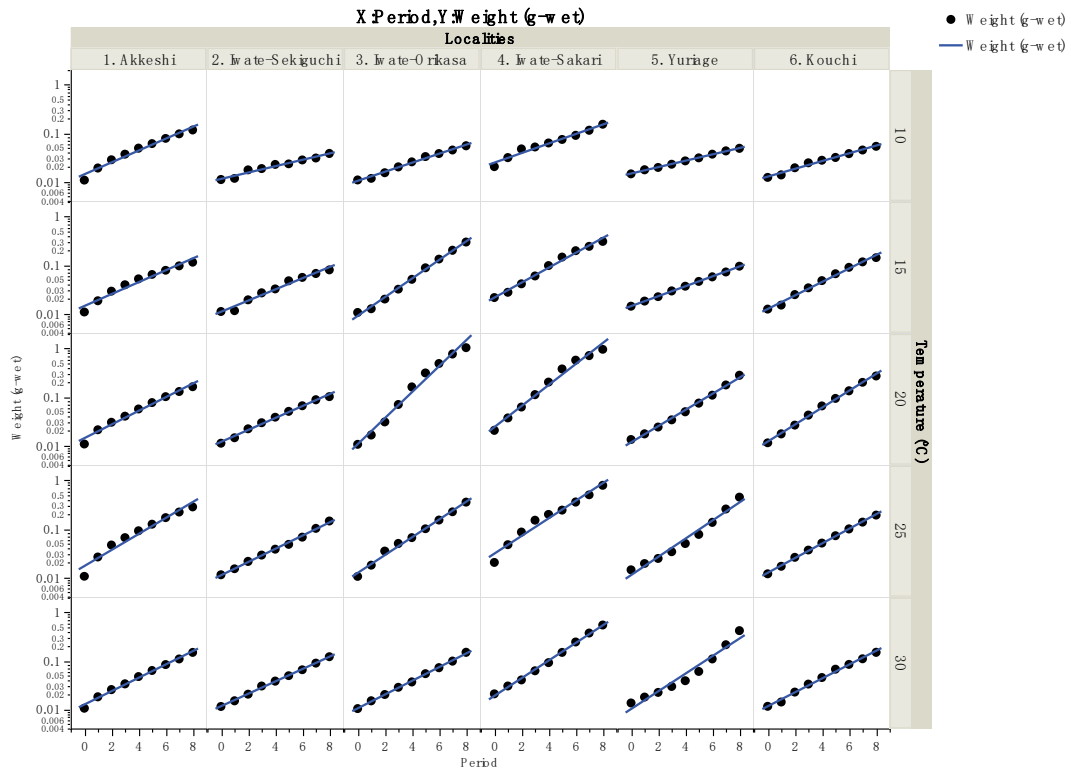

(b)

**Figure S1.** Upper figure: Wet weight variations in thallus clusters of six strains of *Ulva prolifera* incubated in vitro at one of five different temperatures,  $150 \mu\text{mol photons m}^{-2} \text{s}^{-1}$  (12/12 h light/dark cycle) in half-strength ES medium with aeration for 8 d. Lower figure: the same data expressed as natural logarithms. The slopes for each combination of strain and temperature were used to generate the relative growth rate values in Figure 2.

**Table S1.** Differences in RGR, Carbon, and nitrogen contents among five strains of *Ulva prolifera* at 10, 15, 20, 25, and 30 °C. Data were analyzed using Kruskal–Wallis test followed by post-hoc Scheffe’s test for multiple comparisons.

| Temperature | Contents | Kruskal-Wallis test |           |          | Strain | Multiple Comparison test |      |      |      |   |
|-------------|----------|---------------------|-----------|----------|--------|--------------------------|------|------|------|---|
|             |          | $\chi^2$            | <i>df</i> | <i>p</i> |        | 1                        | 2    | 3    | 4    | 5 |
| 10          | RGR      | 13.97               | 5         | 0.016    | 1      | –                        |      |      |      |   |
|             |          |                     |           |          | 2      | n.s.                     | –    |      |      |   |
|             |          |                     |           |          | 3      | n.s.                     | n.s. | –    |      |   |
|             |          |                     |           |          | 4      | n.s.                     | n.s. | n.s. | –    |   |
|             |          |                     |           |          | 5      | **                       | n.s. | n.s. | n.s. | – |
|             | Carbon   | 14.85               | 5         | 0.011    | 1      | –                        |      |      |      |   |
|             |          |                     |           |          | 2      | n.s.                     | –    |      |      |   |
|             |          |                     |           |          | 3      | n.s.                     | n.s. | –    |      |   |
|             |          |                     |           |          | 4      | n.s.                     | n.s. | n.s. | –    |   |
|             |          |                     |           |          | 5      | n.s.                     | n.s. | n.s. | n.s. | – |
|             | Nitrogen | 13.25               | 5         | 0.021    | 1      | –                        |      |      |      |   |
|             |          |                     |           |          | 2      | n.s.                     | –    |      |      |   |
|             |          |                     |           |          | 3      | n.s.                     | n.s. | –    |      |   |
|             |          |                     |           |          | 4      | n.s.                     | n.s. | n.s. | –    |   |
|             |          |                     |           |          | 5      | n.s.                     | n.s. | n.s. | n.s. | – |
| 15          | RGR      | 11.05               | 5         | 0.051    | 1      | –                        |      |      |      |   |
|             |          |                     |           |          | 2      | n.s.                     | –    |      |      |   |
|             |          |                     |           |          | 3      | n.s.                     | n.s. | –    |      |   |
|             |          |                     |           |          | 4      | n.s.                     | n.s. | n.s. | –    |   |
|             |          |                     |           |          | 5      | n.s.                     | n.s. | n.s. | n.s. | – |
|             | Carbon   | 13.30               | 5         | 0.021    | 1      | –                        |      |      |      |   |
|             |          |                     |           |          | 2      | n.s.                     | –    |      |      |   |
|             |          |                     |           |          | 3      | n.s.                     | n.s. | –    |      |   |
|             |          |                     |           |          | 4      | n.s.                     | n.s. | n.s. | –    |   |
|             |          |                     |           |          | 5      | n.s.                     | n.s. | n.s. | n.s. | – |
|             | Nitrogen | 10.24               | 5         | 0.069    | 1      | –                        |      |      |      |   |
|             |          |                     |           |          | 2      |                          | –    |      |      |   |
|             |          |                     |           |          | 3      |                          |      | –    |      |   |
|             |          |                     |           |          | 4      |                          |      |      | –    |   |
|             |          |                     |           |          | 5      |                          |      |      |      | – |
| 20          | RGR      | 20.05               | 5         | 0.001    | 1      | –                        |      |      |      |   |
|             |          |                     |           |          | 2      | n.s.                     | –    |      |      |   |
|             |          |                     |           |          | 3      | n.s.                     | *    | –    |      |   |
|             |          |                     |           |          | 4      | n.s.                     | n.s. | n.s. | –    |   |
|             |          |                     |           |          | 5      | n.s.                     | n.s. | n.s. | n.s. | – |
|             | Carbon   | 13.02               | 5         | 0.023    | 1      | –                        |      |      |      |   |
|             |          |                     |           |          | 2      | n.s.                     | –    |      |      |   |
|             |          |                     |           |          | 3      | n.s.                     | n.s. | –    |      |   |
|             |          |                     |           |          | 4      | n.s.                     | n.s. | n.s. | –    |   |
|             |          |                     |           |          | 5      | n.s.                     | n.s. | n.s. | n.s. | – |
|             | Nitrogen | 14.43               | 5         | 0.013    | 1      | –                        |      |      |      |   |
|             |          |                     |           |          | 2      | n.s.                     | –    |      |      |   |
|             |          |                     |           |          | 3      | n.s.                     | n.s. | –    |      |   |
|             |          |                     |           |          | 4      | n.s.                     | n.s. | n.s. | –    |   |
|             |          |                     |           |          | 5      | n.s.                     | n.s. | n.s. | n.s. | – |
| 25          | RGR      | 6.84                | 5         | 0.233    | 1      | –                        |      |      |      |   |
|             |          |                     |           |          | 2      | n.s.                     | –    |      |      |   |
|             |          |                     |           |          | 3      | n.s.                     | n.s. | –    |      |   |
|             |          |                     |           |          | 4      | n.s.                     | n.s. | n.s. | –    |   |
|             |          |                     |           |          | 5      | n.s.                     | n.s. | n.s. | n.s. | – |
|             | Carbon   | 14.75               | 5         | 0.012    | 1      | –                        |      |      |      |   |
|             |          |                     |           |          | 2      | n.s.                     | –    |      |      |   |
|             |          |                     |           |          | 3      | n.s.                     | n.s. | –    |      |   |
|             |          |                     |           |          | 4      | n.s.                     | n.s. | n.s. | –    |   |
|             |          |                     |           |          | 5      | n.s.                     | n.s. | n.s. | n.s. | – |
|             | Nitrogen | 16.25               | 5         | 0.006    | 1      | –                        |      |      |      |   |
|             |          |                     |           |          | 2      | n.s.                     | –    |      |      |   |
|             |          |                     |           |          | 3      | n.s.                     | n.s. | –    |      |   |
|             |          |                     |           |          | 4      | n.s.                     | n.s. | n.s. | –    |   |
|             |          |                     |           |          | 5      | n.s.                     | n.s. | n.s. | n.s. | – |
| 30          | RGR      | 8.04                | 5         | 0.154    | 1      | –                        |      |      |      |   |

|          |       |   |       |   |      |      |      |      |   |  |
|----------|-------|---|-------|---|------|------|------|------|---|--|
|          |       |   |       | 2 | n.s. | –    |      |      |   |  |
|          |       |   |       | 3 | n.s. | n.s. | –    |      |   |  |
|          |       |   |       | 4 | n.s. | n.s. | n.s. | –    |   |  |
|          |       |   |       | 5 | n.s. | n.s. | n.s. | n.s. | – |  |
|          |       |   |       | 1 | –    |      |      |      |   |  |
|          |       |   |       | 2 | n.s. | –    |      |      |   |  |
| Carbon   | 14.59 | 5 | 0.012 | 3 | n.s. | n.s. | –    |      |   |  |
|          |       |   |       | 4 | n.s. | n.s. | n.s. | –    |   |  |
|          |       |   |       | 5 | n.s. | n.s. | n.s. | n.s. | – |  |
|          |       |   |       | 1 | –    |      |      |      |   |  |
|          |       |   |       | 2 | n.s. | –    |      |      |   |  |
| Nitrogen | 15.69 | 5 | 0.008 | 3 | n.s. | n.s. | –    |      |   |  |
|          |       |   |       | 4 | n.s. | n.s. | n.s. | –    |   |  |
|          |       |   |       | 5 | n.s. | n.s. | n.s. | n.s. | – |  |

---

\* p<0.05; \*\* p<0.01; n.s.: no significance.
